# Supplementary material for: Risk factors for human cutaneous anthrax outbreaks in the hotspot districts of Northern Tanzania: an unmatched case–control study
Source: PubMed Central journal article supplement (PMC6170534; doi:10.1098/rsos.180479), 2018-09-05
Supplement: rsos180479supp1.pdf [file rsos180479supp1.pdf]

**Transmission routes for human cutaneous anthrax outbreaks in the hotspot areas of northern Tanzania**

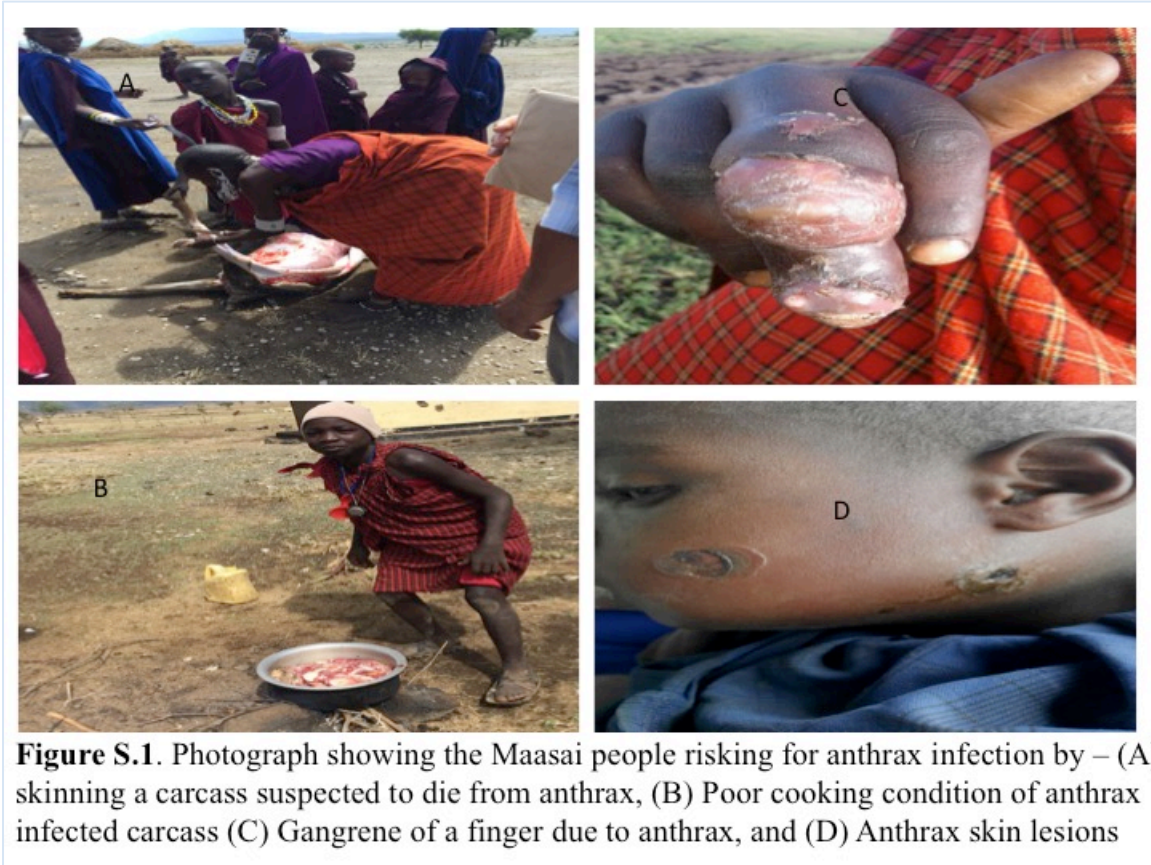

**Figure S.1.** Photograph showing the Maasai people risking for anthrax infection by – (A) skinning a carcass suspected to die from anthrax, (B) Poor cooking condition of anthrax infected carcass (C) Gangrene of a finger due to anthrax, and (D) Anthrax skin lesions
