# Supplementary material for: Risk factors for human cutaneous anthrax outbreaks in the hotspot districts of Northern Tanzania: an unmatched case–control study
Source: PubMed Central journal article supplement (PMC6170534; doi:10.1098/rsos.180479), 2018-09-05
Supplement: rsos180479supp2.pdf [file rsos180479supp2.pdf]

**Interactions between livestock-wildlife and humans as a facilitating factor for continued transmission of *B. anthracis* in the hotspot areas of northern Tanzania**

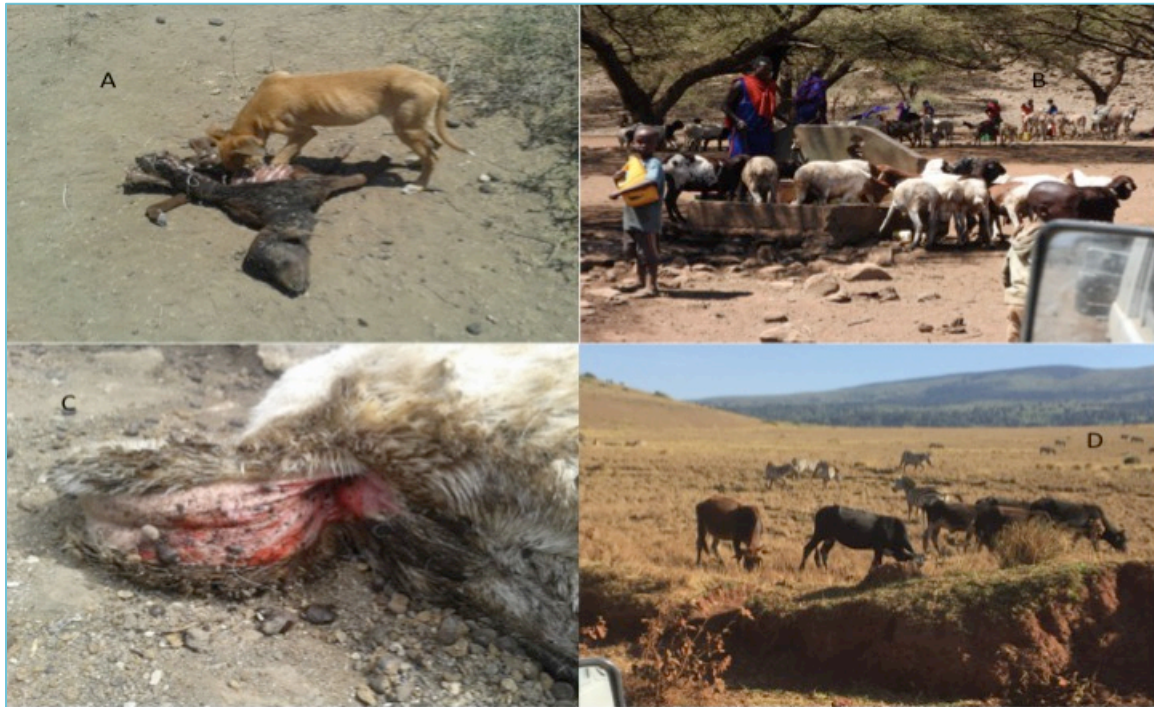

**Figure S.2:** Photographs showing (A) A dog feeding on abandoned carcass of a sheep (B) animals and humans sharing a water source, (C) Un – attended carcass oozing blood as it was found in one the study sites and (D) livestock and wildlife grazing together in Ngorongoro district, Northern Tanzania
