# Supplementary material for: Risk factors for human cutaneous anthrax outbreaks in the hotspot districts of Northern Tanzania: an unmatched case–control study
Source: PubMed Central journal article supplement (PMC6170534; doi:10.1098/rsos.180479), 2018-09-05
Supplement: rsos180479supp3.pdf [file rsos180479supp3.pdf]

**Control measures of anthrax outbreaks in the hotspot areas of northern Tanzania**

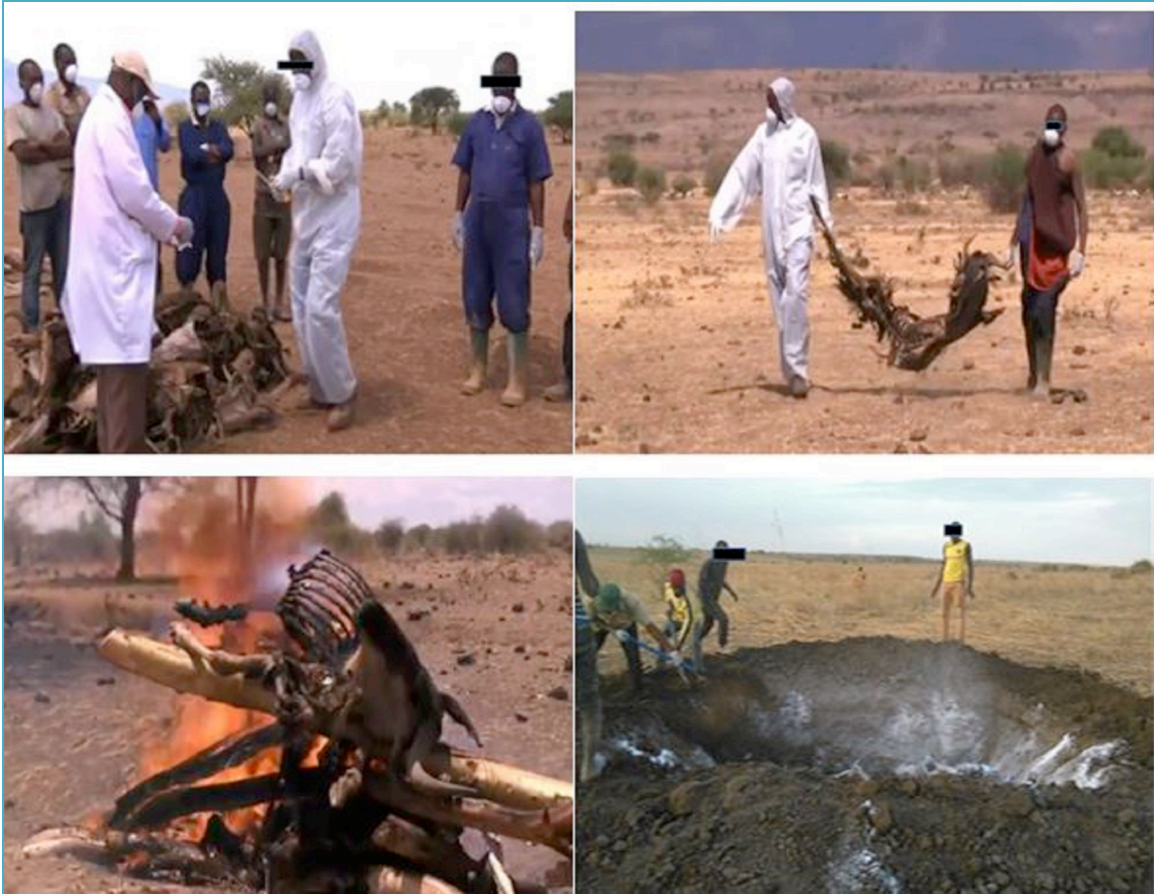

**Figure S.3:** Options for carcass disposal activities during response to anthrax outbreak in one of the hotspot districts of northern Tanzania.
