# Supplementary material for: Risk factors for human cutaneous anthrax outbreaks in the hotspot districts of Northern Tanzania: an unmatched case–control study
Source: PubMed Central journal article supplement (PMC6170534; doi:10.1098/rsos.180479), 2018-09-05
Supplement: rsos180479supp4.pdf [file rsos180479supp4.pdf]

**Regular health education as a tool for controlling anthrax outbreaks in the hotspot areas of northern Tanzania**

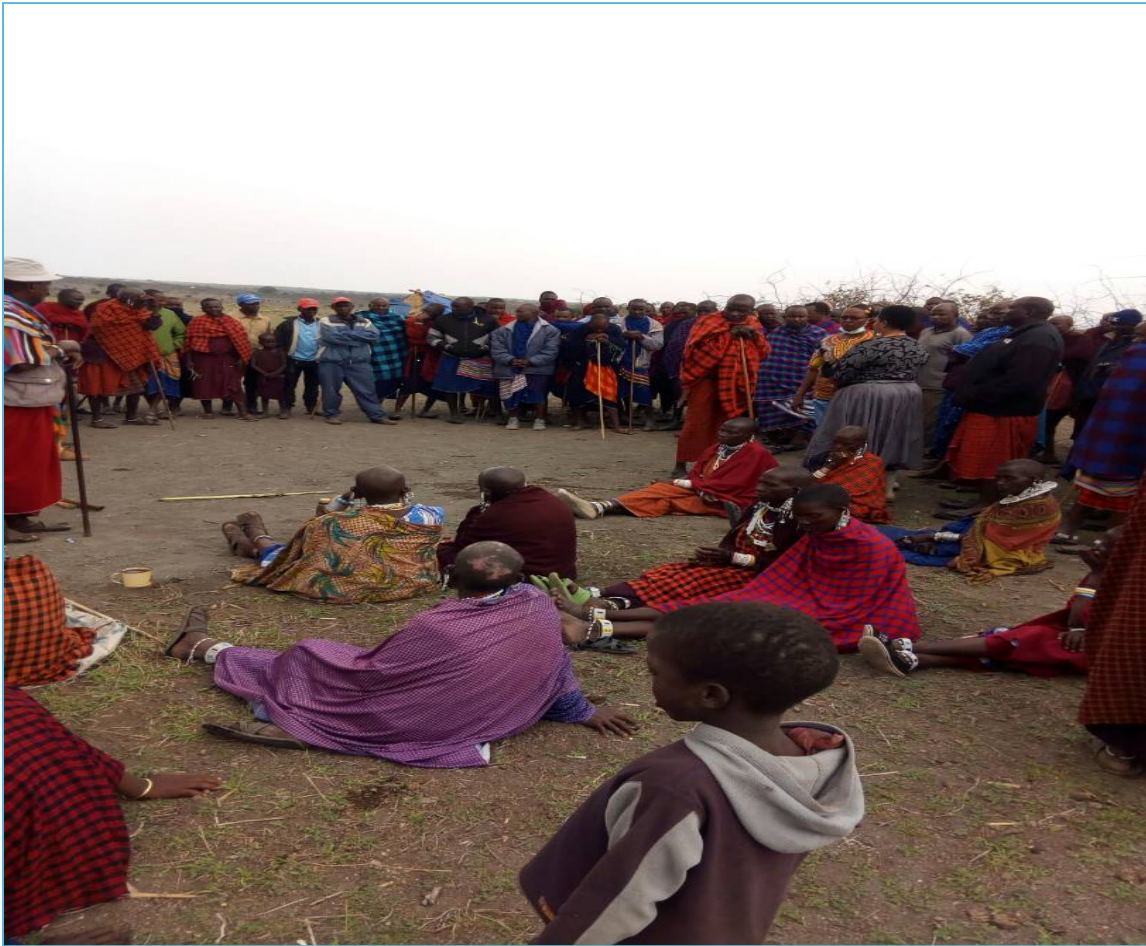

**Figure S.4:** A well-informed Laigwanan delivering health education to the Maasai community during anthrax outbreak in Monduli district, northern Tanzania
